# Supplementary material for: Effects of etomidate use in ICU patients on ventilator therapy: a study of 12,526 patients in an open database from a single center
Source: PubMed Central journal article supplement — Korean J Anesthesiol. 2020 Nov 25;74(4):300–7. doi: 10.4097/kja.20509 (PMC8342844; doi:10.4097/kja.20509), 2020-11-25
Supplement: kja-20509-suppl1.pdf [file kja-20509-suppl1.pdf]

**Supplementary Table 1. Patients Characteristics and Preexisting Conditions Before and After Matching**

|                                  | Before-Matching |          |       | After-Matching |          |       |
|----------------------------------|-----------------|----------|-------|----------------|----------|-------|
|                                  | Etomidate       | Propofol | STD   | Etomidate      | Propofol | STD   |
| N                                | 625             | 11901    | –     | 625            | 6250     | –     |
| Gender (male)                    | 0.55            | 0.62     | -0.08 | 0.55           | 0.55     | -0.01 |
| Age (< 65)                       | 0.47            | 0.54     | -0.07 | 0.47           | 0.47     | 0.00  |
| Age (65–86)                      | 0.46            | 0.41     | 0.05  | 0.46           | 0.46     | -0.00 |
| Age (86 <)                       | 0.07            | 0.05     | 0.03  | 0.07           | 0.07     | 0.00  |
| BMI (< 18.5)                     | 0.03            | 0.02     | 0.01  | 0.03           | 0.03     | 0.00  |
| BMI (18.5–25)                    | 0.32            | 0.26     | 0.07  | 0.32           | 0.31     | 0.01  |
| BMI (25.0–30.0)                  | 0.37            | 0.40     | -0.03 | 0.37           | 0.37     | -0.00 |
| BMI (30 <)                       | 0.28            | 0.33     | -0.05 | 0.28           | 0.29     | -0.01 |
| Ethnicity (white)                | 0.72            | 0.72     | -0.00 | 0.72           | 0.71     | 0.00  |
| Admission type (not elective)    | 0.90            | 0.75     | 0.14  | 0.90           | 0.91     | -0.01 |
| Admission date (before mid-2008) | 0.57            | 0.56     | 0.01  | 0.57           | 0.57     | -0.00 |
| Adrenal insufficiency            | 0.01            | 0.00     | 0.01  | 0.01           | 0.01     | 0.01  |
| Adrenal suppressors              | 0.04            | 0.03     | 0.01  | 0.04           | 0.04     | 0.00  |
| SOFA (5.0 <)                     | 0.50            | 0.38     | 0.12  | 0.50           | 0.49     | 0.01  |
| Congestive heart failure         | 0.38            | 0.26     | 0.12  | 0.38           | 0.36     | 0.02  |
| Cardiac arrhythmias              | 0.37            | 0.33     | 0.04  | 0.37           | 0.36     | 0.00  |
| Valvular disease                 | 0.16            | 0.25     | -0.09 | 0.16           | 0.17     | -0.00 |
| Pulmonary circulation            | 0.10            | 0.07     | 0.03  | 0.10           | 0.10     | 0.01  |
| Peripheral vascular              | 0.16            | 0.13     | 0.03  | 0.16           | 0.15     | 0.01  |
| Hypertension                     | 0.53            | 0.58     | -0.05 | 0.53           | 0.54     | -0.01 |
| Paralysis                        | 0.08            | 0.04     | 0.04  | 0.08           | 0.07     | 0.01  |
| Other neurological               | 0.16            | 0.13     | 0.03  | 0.16           | 0.16     | -0.00 |
| Chronic pulmonary                | 0.25            | 0.19     | 0.07  | 0.25           | 0.24     | 0.01  |
| Diabetes uncomplicated           | 0.19            | 0.21     | -0.03 | 0.19           | 0.20     | -0.01 |
| Diabetes complicated             | 0.08            | 0.06     | 0.02  | 0.08           | 0.08     | -0.00 |
| Hypothyroidism                   | 0.11            | 0.09     | 0.02  | 0.11           | 0.10     | 0.00  |
| Renal failure                    | 0.15            | 0.12     | 0.03  | 0.15           | 0.16     | -0.00 |
| Liver disease                    | 0.11            | 0.08     | 0.03  | 0.11           | 0.11     | 0.01  |
| Peptic ulcer                     | 0.00            | 0.00     | -0.00 | 0.00           | 0.00     | 0.00  |
| AIDS                             | 0.02            | 0.01     | 0.01  | 0.02           | 0.01     | 0.00  |
| Lymphoma                         | 0.03            | 0.01     | 0.02  | 0.03           | 0.02     | 0.01  |
| Metastatic cancer                | 0.06            | 0.04     | 0.02  | 0.06           | 0.06     | 0.00  |
| Solid tumor                      | 0.05            | 0.04     | 0.01  | 0.05           | 0.05     | 0.00  |
| Rheumatoid arthritis             | 0.04            | 0.02     | 0.01  | 0.04           | 0.03     | 0.00  |
| Coagulopathy                     | 0.23            | 0.13     | 0.10  | 0.23           | 0.20     | 0.03  |
| Obesity                          | 0.07            | 0.08     | -0.01 | 0.07           | 0.07     | -0.00 |
| Weight loss                      | 0.09            | 0.04     | 0.04  | 0.09           | 0.07     | 0.01  |
| Fluid electrolyte                | 0.45            | 0.27     | 0.18  | 0.45           | 0.42     | 0.03  |
| Blood loss anemia                | 0.02            | 0.02     | 0.01  | 0.02           | 0.02     | -0.00 |
| Deficiency anemias               | 0.22            | 0.18     | 0.04  | 0.22           | 0.21     | 0.00  |
| Alcohol abuse                    | 0.09            | 0.09     | -0.00 | 0.09           | 0.09     | -0.00 |
| Drug abuse                       | 0.02            | 0.04     | -0.02 | 0.02           | 0.02     | -0.00 |
| Psychoses                        | 0.04            | 0.04     | -0.00 | 0.04           | 0.04     | -0.00 |
| Depression                       | 0.09            | 0.07     | 0.02  | 0.09           | 0.09     | 0.01  |

STD; Standardized Differences, whose absolute values are targeted to below 0.1
